# Supplementary material for: Association between Malnutrition and Depression in Patients with Cancer: The Importance of Nutritional Status Evaluation in Cancer Care
Source: Int J Environ Res Public Health. 2023 Jan 27;20(3):2295. doi: 10.3390/ijerph20032295 (PMC9916136; doi:10.3390/ijerph20032295)
Supplement: Supplementary file 1 [file ijerph-20-02295-s001.zip › Supplementary Table S1.pdf]

**Supplementary Table S1.** Prevalence of depression by cancer site.

| <b>Cancer site</b>                      | <b>N (%)</b> |  |
|-----------------------------------------|--------------|--|
| Colorectal cancer                       | 22 (24.4)    |  |
| Soft tissue cancer                      | 15 (16.7)    |  |
| Non-Hodgkin's lymphoma                  | 13 (14.4)    |  |
| Pancreatic cancer and bile ducts cancer | 10 (11.1)    |  |
| Gastric cancer                          | 7 (7.8)      |  |
| Bone cancer                             | 6 (6.7)      |  |
| Testicle cancer                         | 4 (4.4)      |  |
| Esophageal cancer                       | 3 (3.3)      |  |
| Renal cancer                            | 2 (2.2)      |  |
| Hepatic cancer                          | 2 (2.2)      |  |
| Unspecified primary cancer              | 2 (2.2)      |  |
| Meningeal cancer                        | 1 (1.1)      |  |
| Penile cancer                           | 1 (1.1)      |  |
| Lung cancer                             | 1 (1.1)      |  |
| Adrenal cancer                          | 1 (1.1)      |  |
